# Supplementary material for: Recombination Dynamics of a Human Y-Chromosomal Palindrome: Rapid GC-Biased Gene Conversion, Multi-kilobase Conversion Tracts, and Rare Inversions
Source: PLoS Genet. 2013 Jul 25;9(7):e1003666. doi: 10.1371/journal.pgen.1003666 (PMC3723533; doi:10.1371/journal.pgen.1003666)
Supplement: Table S1 — Genotyping results. (XLSX) [file pgen.1003666.s003.xlsx]

## Sheet: S1 PSV genotypes
Table S1. Genotyping results
No	Sample ID	Population	Geographic origin	Final Y-hg with full name	Y-hg shorthand names used	Terminal marker	PSV 1 [(0)G/(1)A]	Conversion to derived (1)a	Conversion to ancestral (0)a	PSV 2 [(0)C/(1)G]	Conversion to derived (1)a	Conversion to ancestral (0)a	PSV 3 [(0)A/(1)T]	Conversion to derived (1)a	Conversion to ancestral (0)a	PSV 4 [(0)C/(1)A]	Conversion to derived (1)a	Conversion to ancestral (0)a	PSV 5 [(0)C/(1)T]	Conversion to derived (1)a	Conversion to ancestral (0)a	PSV 6 [(0)T/(1)C]	Conversion to derived (1)a	Conversion to ancestral (0)a	PSV 7 [(0)G/(1)A]	Conversion to derived (1)a	Conversion to ancestral (0)a	PSV 8 [(0)G/(1)C]	Conversion to derived (1)a	Conversion to ancestral (0)a	PSV 9 [(0)G/(1)T]	Conversion to derived (1)a	Conversion to ancestral (0)a	PSV 10 [(0)T/(1)A] monomorphic	Phased by LR-PCR	PRT assay	Arm-specific 10kb PCR
1	HGDP00987	San	Namibia	A2		M6,M14,M49,M71	0			0			0			0			0			0/1			0/1			0			0			0
2	HGDP00988	San	Namibia	A2		M6	0			0			0			0			0			0/1			0/1			0			0			0
3	HGDP01029	San	Namibia	A2		M6,M14,M49,M71	0			0			0			0			0			0/1			0/1			0			0			0	yes
4	HGDP01036	San	Namibia	A3b1*		M51	0/1			0			0			0			0			1	1		0		1	0			0			0	yes	yes
5	HGDP01406	Bantu N.E.	Kenya	A3b2*(xA3b2a)	A3b2*	M63	0/1			0			0			0			0			0/1			0/1			0			0			0	yes
6	HGDP00462	Mbuti Pygmies	Democratic Republic of Congo	B2a		M150	1	1		0			0			0/1			0			0/1			0		1	0			0			0	yes
7	HGDP00478	Mbuti Pygmies	Democratic Republic of Congo	B2a		M150	1	*		0			0			0/1			0			0/1			0		*	0			0			0	yes
8	HGDP00457	Biaka Pygmies	Central African Republic	B2a1a		M152	0/1			0			0			0/1			0			0/1			0/1			0			0			0	yes
9	HGDP00621	Bedouin	Israel (Negev)	B2a1a		M152	0/1			0			0			0/1			0			0/1			0/1			0			0			0
10	HGDP01033	Bantu S.E. Zulu	South Africa	B2a1a		M152	0/1			0			0			0/1			0			0/1			0/1			0			0			0
11	HGDP00449	Mbuti Pygmies	Democratic Republic of Congo	B2b		M112	0		1	0			0			0		1	0			0/1			0/1			0			0			0		yes
12	HGDP00453	Biaka Pygmies	Central African Republic	B2b		M112	0/1			0			0			0/1			0			0/1			0/1			0			0			0	yes
13	HGDP00461	Biaka Pygmies	Central African Republic	B2b		M112	0/1			0			0			1	1		0			0/1			0/1			0			0			0
14	HGDP00479	Biaka Pygmies	Central African Republic	B2b		M112	0/1			0			0			0/1			0			0/1			0/1			0			0			0
15	HGDP00991	San	Namibia	B2b		M112	0/1			0			0			0		*	0			0/1			0		1	0			0			0
16	HGDP01032	San	Namibia	B2b		M112	0/1			0			0			0		*	0			0/1			0		*	0			0			0
17	HGDP00992	San	Namibia	B2b4		P7	0/1			0			0			1	*		0			0/1			0/1			0			0			0	yes
18	HGDP00452	Biaka Pygmies	Central African Republic	B2b4b		M211	0		1	0			0			1	*		0			0/1			0/1			0			0			0	yes
19	HGDP00475	Biaka Pygmies	Central African Republic	B2b4b		M211	0		*	0			0			1	*		0			0/1			0/1			0			0			0		yes
20	HGDP01090	Biaka Pygmies	Central African Republic	B2b4b		M211	0		*	0			0			1	*		0			0/1			0/1			0			0			0
21	HGDP00984	Mbuti Pygmies	Democratic Republic of Congo	B2b2		M169	0/1			0			0			1	*		0			0/1			0/1			0			0			0	yes		yes
22	HGDP00467	Mbuti Pygmies	Democratic Republic of Congo	B2b2		M169	0/1			0			0			1	*		0			0/1			0/1			0			0			0	yes
23	HGDP01310	Dai	China	C*(xC1,C2,C3)	C*	M130,M168,M294	0/1			0			0/1			0/1			0			0/1			0/1			1			0			0	yes
24	HGDP00112	Hazara	Pakistan	C3(xC3c)	C3	M217	0		1	0			0/1			0		1	0			0/1			0/1			1			0			0	yes
25	HGDP00125	Hazara	Pakistan	C3(xC3c)	C3	M217	0/1			0			0/1			0		*	0			0		1	0/1			1			0			0		yes
26	HGDP00128	Hazara	Pakistan	C3(xC3c)	C3	M217	0		*	0			0/1			0		*	0			0/1			0/1			1			0			0
27	HGDP00220	Pathan	Pakistan	C3(xC3c)	C3	M217	0		*	0			0/1			0		*	0			0/1			0/1			1			0			0
28	HGDP00423	Burusho	Pakistan	C3(xC3c)	C3	M217	0/1			0			0/1			0		*	0			0		*	1	1		1			0			0		yes
29	HGDP00767	Japanese	Japan	C3(xC3c)	C3	M217	0/1			0			0/1			0		*	0			0/1			0/1			1			0			0	yes
30	HGDP00768	Japanese	Japan	C3(xC3c)	C3	M217	0		*	0			1	1		0		*	0			0/1			0/1			1			0			0		yes
31	HGDP00962	Yakut	Siberia	C3(xC3c)	C3	M217	0/1			0			0/1			0		*	0			0		*	0/1			1			0			0
32	HGDP01213	Daur	China	C3(xC3c)	C3	M217	0		*	0			0/1			0		*	0			0/1			0/1			1			0			0
33	HGDP01218	Daur	China	C3(xC3c)	C3	M217	0		*	0			0/1			0		*	0			0/1			0/1			1			0			0
34	HGDP01230	Mongola	China	C3(xC3c)	C3	M217	0		*	0			0/1			0		*	0			0/1			0/1			1			0			0
35	HGDP01288	Han	China	C3(xC3c)	C3	M217	0/1			0			0/1			0		*	0			0		*	0/1			1			0			0
36	HGDP01296	Han	China	C3(xC3c)	C3	M217	0		*	0			0/1			0		*	0			0/1			0/1			1			0			0
37	HGDP01308	Dai	China	C3(xC3c)	C3	M217	0/1			0			1	*		0		*	0			0/1			0/1			1			0			0		yes
38	HGDP01214	Daur	China	D*(xD2)	D*	M174,IMS-JST021355	0		1	0			0/1			0/1			0			0/1			0/1			0		1	0			0	yes
39	HGDP01226	Mongola	China	D*(xD2)	D*	M174,IMS-JST021355	0		*	0			1	1		0		1	0			0/1			0/1			0/1			0			0		yes
40	HGDP00752	Japanese	Japan	D2		12f2,P37.1,M55,M64.1,M179	0/1			0			0/1			0		*	0			1	1		0		1	0/1			0			0	yes	yes
41	HGDP00769	Japanese	Japan	D2		12f2,P37.1,M55,M64.1,M179	0/1			0			0/1			0		*	0			1	*		0		*	0/1			0			0
42	HGDP00757	Japanese	Japan	D2(rev12f2)		P37.1,M55,M64.1,M179	0/1			0			0/1			0		*	0			0/1			0/1			0/1			0			0	yes
43	HGDP00617	Bedouin	Israel (Negev)	E1a		M132	0/1			0			0/1			0/1			0			0/1			0/1			1	1		0			0
44	HGDP01200	Mandenka	Senegal	E1a		M132	0/1			0			0/1			0/1			0			0/1			0/1			0/1			0			0	yes
45	HGDP01284	Mandenka	Senegal	E1a		M132	0/1			0			0/1			0/1			0			0/1			0/1			0		1	0			0
46	HGDP00904	Mandenka	Senegal	E1b1a*(xE1b1a6,7,8)	E1b1a*	M180,P182	0/1			0			0/1			0/1			0			0/1			0/1			0/1			0			0	yes
47	HGDP00905	Mandenka	Senegal	E1b1a*(xE1b1a6,7,8)	E1b1a*	M180,P182	0/1			0			0/1			0/1			0			0/1			0/1			0/1			0			0	yes
48	HGDP00906	Mandenka	Senegal	E1b1a*(xE1b1a6,7,8)	E1b1a*	M180,P182	0/1			0			0/1			0/1			0			0/1			0/1			0/1			0			0		yes
49	HGDP00907	Mandenka	Senegal	E1b1a*(xE1b1a6,7,8)	E1b1a*	M180,P182	0/1			0			0/1			0/1			0			0/1			0/1			0/1			0			0
50	HGDP00908	Mandenka	Senegal	E1b1a*(xE1b1a6,7,8)	E1b1a*	M180,P182	0/1			0			0/1			0/1			0			0/1			0/1			0/1			0			0
51	HGDP00911	Mandenka	Senegal	E1b1a*(xE1b1a6,7,8)	E1b1a*	M180,P182	0/1			0			0/1			0/1			0			0/1			0/1			0/1			0			0
52	HGDP00912	Mandenka	Senegal	E1b1a*(xE1b1a6,7,8)	E1b1a*	M180,P182	0/1			0			0/1			0/1			0			0/1			0/1			0/1			0			0
53	HGDP00913	Mandenka	Senegal	E1b1a*(xE1b1a6,7,8)	E1b1a*	M180,P182	0/1			0			0/1			0/1			0			0/1			0/1			0/1			0			0
54	HGDP00932	Yoruba	Nigeria	E1b1a*(xE1b1a6,7,8)	E1b1a*	M180,P182	0/1			0			0/1			0/1			0			0/1			0/1			1	1		0			0
55	HGDP00941	Yoruba	Nigeria	E1b1a*(xE1b1a6,7,8)	E1b1a*	M180,P182	0/1			0			0/1			0/1			0			0/1			0/1			0/1			0			0
56	HGDP01028	Bantu S.W. Herero	South Africa	E1b1a*(xE1b1a6,7,8)	E1b1a*	M180,P182	0/1			0			0/1			0/1			0			0/1			0/1			0/1			0			0
57	HGDP01030	Bantu S.E. Tswana	South Africa	E1b1a*(xE1b1a6,7,8)	E1b1a*	M180,P182	0		1	0			1	1		0/1			0			1	1		0		1	0/1			0			0
58	HGDP01283	Mandenka	Senegal	E1b1a*(xE1b1a6,7,8)	E1b1a*	M180,P182	0/1			0			0/1			0/1			0			0/1			0/1			0/1			0			0
59	HGDP01285	Mandenka	Senegal	E1b1a*(xE1b1a6,7,8)	E1b1a*	M180,P182	0/1			0			0/1			0/1			0			0/1			0/1			0/1			0			0
75	HGDP00448	Biaka Pygmies	Central African Republic	E1b1a7*		M191	0/1			0			0/1			0/1			0			0/1			0/1			0/1			0			0	yes
76	HGDP00451	Biaka Pygmies	Central African Republic	E1b1a7*		M191	0/1			0			0/1			0/1			0			0/1			0/1			0/1			0			0
77	HGDP00454	Biaka Pygmies	Central African Republic	E1b1a7*		M191,U247,U174	0/1			0			0/1			0/1			0			0/1			0/1			0/1			0			0
78	HGDP00456	Mbuti Pygmies	Democratic Republic of Congo	E1b1a7*		M191,U247,U174	0/1			0			0/1			0/1			0			1	1		0/1			0/1			0			0
79	HGDP00458	Biaka Pygmies	Central African Republic	E1b1a7*		M191,U247,U174	0/1			0			0/1			0		1	0			0/1			0/1			0/1			0			0
80	HGDP00459	Biaka Pygmies	Central African Republic	E1b1a7*		M191,U247,U174	0/1			0			0/1			0/1			0			0/1			0/1			0/1			0			0
81	HGDP00460	Biaka Pygmies	Central African Republic	E1b1a7*		M191,U247,U174	0/1			0			0/1			0/1			0			0/1			0/1			0/1			0			0
82	HGDP00464	Biaka Pygmies	Central African Republic	E1b1a7*		M191,U247,U174	0/1			0			0/1			0/1			0			0/1			0/1			0/1			0			0
83	HGDP00465	Biaka Pygmies	Central African Republic	E1b1a7*		M191,U247,U174	0/1			0			0/1			0/1			0			0/1			0/1			0/1			0			0
84	HGDP00466	Biaka Pygmies	Central African Republic	E1b1a7*		M191,U247,U174	0/1			0			0/1			0/1			0			0/1			0/1			0/1			0			0
85	HGDP00470	Biaka Pygmies	Central African Republic	E1b1a7*		M191,U247,U174	0/1			0			0/1			0/1			0			0/1			0/1			0/1			0			0
86	HGDP00472	Biaka Pygmies	Central African Republic	E1b1a7*		M191,U247,U174	0/1			0			0/1			0/1			0			0/1			0/1			0/1			0			0
87	HGDP00927	Yoruba	Nigeria	E1b1a7*		M191,U247,U174	0/1			0			0/1			0/1			0			0/1			0/1			0/1			0			0
88	HGDP00929	Yoruba	Nigeria	E1b1a7*		M191,U247,U174	0/1			0			1	1		0/1			0			0/1			0/1			0/1			0			0
89	HGDP00936	Yoruba	Nigeria	E1b1a7*		M191,U247,U174	0/1			0			0/1			0/1			0			0/1			0/1			0/1			0			0
90	HGDP00940	Yoruba	Nigeria	E1b1a7*		M191,U247,U174	0/1			0			0/1			0/1			0			0/1			0/1			0/1			0			0
91	HGDP00942	Yoruba	Nigeria	E1b1a7*		M191,U247,U174	0/1			0			0/1			0/1			0			1	*		0/1			1	1		0			0
92	HGDP00943	Yoruba	Nigeria	E1b1a7*		M191,U247,U174	0/1			0			0/1			0/1			0			0/1			0/1			0/1			0			0
93	HGDP01034	Bantu S.E. Tswana	South Africa	E1b1a7*		M191,U247,U174	0/1			0			0/1			0/1			0			0/1			0/1			0/1			0			0
94	HGDP01081	Mbuti Pygmies	Democratic Republic of Congo	E1b1a7*		M191,U247,U174	0/1			0			0/1			0/1			0			0/1			0/1			0		1	0			0
95	HGDP01086	Biaka Pygmies	Central African Republic	E1b1a7*		M191,U247,U174	0		1	0			1	*		0/1			0			0/1			0/1			0/1			0			0
96	HGDP01088	Biaka Pygmies	Central African Republic	E1b1a7*		M191	0/1			0			0/1			0/1			0			0/1			0/1			0/1			0			0
97	HGDP01091	Biaka Pygmies	Central African Republic	E1b1a7*		M191	0/1			0			0/1			0/1			0			0/1			0/1			0/1			0			0
98	HGDP01408	Bantu N.E.	Kenya	E1b1a7*		M191,U247,U174	0/1			0			0/1			0/1			0			0/1			0/1			0/1			0			0
99	HGDP01412	Bantu N.E.	Kenya	E1b1a7*		M191,U247,U174	0/1			0			0/1			0/1			0			0/1			0/1			0/1			0			0
100	HGDP01416	Bantu N.E.	Kenya	E1b1a7*		M191,U247,U174	0/1			0			0/1			0/1			0			0/1			0/1			0/1			0			0
101	HGDP01418	Bantu N.E.	Kenya	E1b1a7*		M191,U247,U174	0/1			0			0/1			0/1			0			0/1			0/1			0/1			0			0
102	HGDP00450	Mbuti Pygmies	Democratic Republic of Congo	E1b1a7*		M191,U247,U174	0/1			0			0/1			0/1			0			1	*		0/1			0/1			0			0
60	HGDP00455	Biaka Pygmies	Central African Republic	E1b1a8a		P278	0/1			0			0/1			0/1			0			0/1			0/1			0		1	0			0	yes
61	HGDP00469	Biaka Pygmies	Central African Republic	E1b1a8a		P278	0/1			0			0/1			0/1			0			0/1			0/1			0		*	0			0
62	HGDP00473	Biaka Pygmies	Central African Republic	E1b1a8a		P278	0/1			0			0/1			0/1			0			0/1			0/1			0/1			0			0
63	HGDP00474	Mbuti Pygmies	Democratic Republic of Congo	E1b1a8a		P278	0/1			0			0/1			1	1		0			0/1			0/1			0/1			0			0
64	HGDP00930	Yoruba	Nigeria	E1b1a8a		P278	0/1			0			0/1			0/1			0			0/1			0/1			0/1			0			0
65	HGDP00937	Yoruba	Nigeria	E1b1a8a		P278	0/1			0			0/1			0/1			0			0/1			0/1			0/1			0			0
66	HGDP00985	Biaka Pygmies	Central African Republic	E1b1a8a		P278	0/1			0			0/1			0/1			0			0/1			0/1			0		*	0			0
67	HGDP00986	Biaka Pygmies	Central African Republic	E1b1a8a		P278	0/1			0			0/1			0/1			0			0/1			0/1			0		*	0			0
68	HGDP00993	Bantu S.E. Pedi	South Africa	E1b1a8a		P278	0/1			0			0/1			0/1			0			0/1			0/1			0/1			0			0
69	HGDP01094	Biaka Pygmies	Central African Republic	E1b1a8a		P278	0/1			0			0/1			0/1			0			0/1			0/1			0/1			0			0
70	HGDP01199	Mandenka	Senegal	E1b1a8a		P278	0/1			0			0/1			0/1			0			0/1			0/1			0/1			0			0
71	HGDP01260	Mozabite	Algeria (Mzab)	E1b1a8a		P278	0/1			0			0/1			0/1			0			0/1			0/1			0		*	0			0
72	HGDP01269	Mozabite	Algeria (Mzab)	E1b1a8a		P278	0/1			0			0/1			0/1			0			0/1			0/1			0		*	0			0
73	HGDP01415	Bantu N.E.	Kenya	E1b1a8a		P278	0/1			0			0/1			0/1			0			0/1			0/1			0/1			0			0
74	HGDP01419	Bantu N.E.	Kenya	E1b1a8a		P278	0/1			0			0/1			0/1			0			0/1			0/1			0/1			0			0
103	HGDP01411	Bantu N.E.	Kenya	E1b1b1*(xE1b1b1a,b,c,d)	E1b1b1*	M35	0		1	0			0/1			0/1			0			0/1			0/1			0		1	0			0	yes
104	HGDP00994	Bantu S.E. S.Sotho	South Africa	E1b1b1*(xE1b1b1a,b,c,d)	E1b1b1*	M35	0		*	0			0/1			0/1			0			0/1			0/1			0		*	0			0
105	HGDP00599	Druze	Israel (Carmel)	E1b1b1a		M78	0		*	0			0/1			0/1			0			0/1			0/1			0/1			0			0	yes
106	HGDP00603	Druze	Israel (Carmel)	E1b1b1a		M78	0		*	0			0/1			0/1			0			0/1			0/1			0/1			0			0
107	HGDP00640	Bedouin	Israel (Negev)	E1b1b1a		M78	0		*	0			0/1			0/1			0			0/1			0/1			0/1			0			0
108	HGDP00722	Palestinian	Israel (Central)	E1b1b1a		M78	0		*	0			0/1			0/1			0			0/1			0/1			0/1			0			0
109	HGDP01286	Mandenka	Senegal	E1b1b1a		M78	0		*	0			0/1			0/1			0			0/1			0/1			0/1			0			0
112	HGDP00620	Bedouin	Israel (Negev)	E1b1b1b2		M183	0		*	0			0/1			0		1	0			0/1			0/1			1	1		0			0
113	HGDP01253	Mozabite	Algeria (Mzab)	E1b1b1b2		M183	0		*	0			0/1			0		*	0			0/1			0/1			1	*		0			0
114	HGDP01255	Mozabite	Algeria (Mzab)	E1b1b1b2		M183	0		*	0			0/1			0		*	0			0/1			0/1			1	*		0			0
115	HGDP01256	Mozabite	Algeria (Mzab)	E1b1b1b2		M183	0		*	0			0/1			0		*	0			0/1			0/1			1	*		0			0
116	HGDP01257	Mozabite	Algeria (Mzab)	E1b1b1b2		M183	0		*	0			0/1			0		*	0			0/1			0/1			1	*		0			0
117	HGDP01258	Mozabite	Algeria (Mzab)	E1b1b1b2		M183	0		*	0			0/1			0		*	0			0/1			0/1			1	*		0			0
118	HGDP01259	Mozabite	Algeria (Mzab)	E1b1b1b2		M183	0		*	0			0/1			0		*	0			0/1			0/1			1	*		0			0
119	HGDP01263	Mozabite	Algeria (Mzab)	E1b1b1b2		M183	0		*	0			0/1			0		*	0			0/1			0/1			1	*		0			0	yes
120	HGDP01264	Mozabite	Algeria (Mzab)	E1b1b1b2		M183	0		*	0			0/1			0		*	0			0/1			0/1			1	*		0			0
121	HGDP01265	Mozabite	Algeria (Mzab)	E1b1b1b2		M183	0		*	0			0/1			0		*	0			0/1			0/1			1	*		0			0	yes
122	HGDP01268	Mozabite	Algeria (Mzab)	E1b1b1b2		M183	0		*	0			0/1			0		*	0			0/1			0/1			1	*		0			0
123	HGDP01272	Mozabite	Algeria (Mzab)	E1b1b1b2		M183	0		*	0			0/1			0		*	0			0/1			0/1			1	*		0			0	yes
124	HGDP01278	Mozabite	Algeria (Mzab)	E1b1b1b2		M183	0		*	0			0/1			0		*	0			0/1			0/1			1	*		0			0	yes
125	HGDP01279	Mozabite	Algeria (Mzab)	E1b1b1b2		M183	0		*	0			0/1			0		*	0			0/1			0/1			1	*		0			0
126	HGDP01282	Mozabite	Algeria (Mzab)	E1b1b1b2		M183	0		*	0			0/1			0		*	0			0/1			0/1			1	*		0			0
110	HGDP00628	Bedouin	Israel (Negev)	E1b1b1c*(xE1b1b1c1b)	E1b1b1c*	M123	0		*	0			0/1			0/1			0			0/1			0/1			0		1	0			0
111	HGDP00642	Bedouin	Israel (Negev)	E1b1b1c*(xE1b1b1c1b)	E1b1b1c*	M123	0		*	0			0/1			0/1			0			0/1			0/1			0		*	0			0	yes
127	HGDP00463	Mbuti Pygmies	Democratic Republic of Congo	E2*(xE2b1a1)	E2*	M75	0/1			0			0/1			0		1	0			0/1			0/1			0/1			0			0	yes
128	HGDP01031	Bantu S.W. Ovambo	South Africa	E2*(xE2b1a1)	E2*	M75	0/1			0			1	1		0		*	0			1	1		0/1			0/1			0			0		yes
129	HGDP01405	Bantu N.E.	Kenya	E2*(xE2b1a1)	E2*	M75	0/1			0			0/1			0/1			0			0		1	0/1			0		1	0			0	yes
130	HGDP01417	Bantu N.E.	Kenya	E2*(xE2b1a1)	E2*	M75	0/1			0			0/1			0		*	0			0/1			0/1			0/1			0			0
131	HGDP00982	Mbuti Pygmies	Democratic Republic of Congo	E2b1a1		P45	0/1			0			0/1			0		*	0			0/1			0/1			0/1			0			0
132	HGDP00983	Mbuti Pygmies	Democratic Republic of Congo	E2b1a1		P45	0/1			0			0/1			0		*	0			0/1			0/1			0/1			0			0	yes
133	HGDP00528	French	France	F*(xF2)	F*	M89,M213,P135,P138,P145,P148,P149,P151,P157,P159,P160,P166	1	1		1	1		0		1	0		1	0			0/1			0/1			0		1	0			0	yes	yes
134	HGDP01317	Lahu	China	F2		M427,M428	0		1	0		1	1	1		1	1		0			1	1		0		1	0/1			0			0	yes
135	HGDP01318	Lahu	China	F2		M427,M428	0		*	0		*	1	*		1	*		0			1	*		0		*	0/1			0			0		yes
136	HGDP01320	Lahu	China	F2		M427,M428	0		*	0		*	1	*		1	*		0			1	*		0		*	0		1	0			0		yes
137	HGDP01321	Lahu	China	F2		M427,M428	0		*	0		*	1	*		1	*		0			1	*		0		*	0/1			0			0			yes
138	HGDP01322	Lahu	China	F2		M427,M428	0		*	0		*	1	*		1	*		0			1	*		0		*	0/1			0			0			yes
139	HGDP00351	Burusho	Pakistan	G2*(xG2a)	G2*	P287	0/1			0/1			0/1			0		1	0			0/1			0/1			1	1		0			0	yes
140	HGDP00222	Pathan	Pakistan	G2a*(xG2a2)	G2a*	P15	0/1			0/1			0/1			0/1			0			0/1			0/1			1	*		0			0	yes
141	HGDP00285	Kalash	Pakistan	G2a*(xG2a2)	G2a*	P15	0/1			0/1			0/1			0/1			0			1	1		0		1	1	*		0			0
142	HGDP00288	Kalash	Pakistan	G2a*(xG2a2)	G2a*	P15	0/1			0/1			0/1			0/1			0			1	*		0		*	1	*		0			0
143	HGDP00290	Kalash	Pakistan	G2a*(xG2a2)	G2a*	P15	0/1			0/1			0/1			0/1			0			1	*		0		*	1	*		0			0		yes
144	HGDP00292	Kalash	Pakistan	G2a*(xG2a2)	G2a*	P15	0/1			0/1			0/1			0/1			0			1	*		0		*	1	*		0			0
145	HGDP00626	Bedouin	Israel (Negev)	G2a*(xG2a2)	G2a*	P15	0		1	0		1	0/1			0/1			0			1	*		0/1			1	*		0			0
146	HGDP00675	Palestinian	Israel (Central)	G2a*(xG2a2)	G2a*	P15	0		*	0/1			0/1			1	1		0			0/1			0/1			1	*		0			0
147	HGDP00676	Palestinian	Israel (Central)	G2a*(xG2a2)	G2a*	P15	0		*	0/1			0/1			1	*		0			0/1			0/1			1	*		0			0
148	HGDP00677	Palestinian	Israel (Central)	G2a*(xG2a2)	G2a*	P15	0		*	0/1			0/1			1	*		0			0/1			0/1			1	*		0			0
149	HGDP00724	Palestinian	Israel (Central)	G2a*(xG2a2)	G2a*	P15	0/1			0/1			0/1			0/1			0			0/1			0/1			1	*		0			0		yes
150	HGDP00726	Palestinian	Israel (Central)	G2a*(xG2a2)	G2a*	P15	0		*	0/1			0/1			1	*		0			0/1			0/1			1	*		0			0
151	HGDP00727	Palestinian	Israel (Central)	G2a*(xG2a2)	G2a*	P15	0		*	0/1			0/1			1	*		0			0/1			0/1			1	*		0			0
152	HGDP00893	Russian	Russia	G2a*(xG2a2)	G2a*	P15	0/1			0/1			0/1			0/1			0			0/1			0/1			1	*		0			0
153	HGDP01385	Adygei	Russia Caucasus	G2a*(xG2a2)	G2a*	P15	0/1			0/1			0/1			0/1			0			0/1			0/1			1	*		0			0
154	HGDP01404	Adygei	Russia Caucasus	G2a*(xG2a2)	G2a*	P15	0/1			0/1			0/1			0/1			0			0/1			0/1			1	*		0			0
155	HGDP00254	Pathan	Pakistan	H*(xH1)	H*	M69	0/1			0/1			0/1			0/1			0			0/1			1	1		1	1		0			0	yes
156	HGDP00224	Pathan	Pakistan	H1		M52	0/1			0/1			0/1			0/1			0			0/1			0/1			1	*		0			0	yes
157	HGDP00319	Kalash	Pakistan	H1		M52	0		1	0		1	0/1			0/1			0			0/1			0/1			1	*		0			0
158	HGDP00321	Kalash	Pakistan	H1		M52	0		*	0		*	0/1			0/1			0			0/1			0/1			1	*		0			0
159	HGDP00326	Kalash	Pakistan	H1		M52	0		*	0		*	0/1			0/1			0			0/1			0/1			1	*		0			0
160	HGDP00328	Kalash	Pakistan	H1		M52	0		*	0		*	0/1			0/1			0			0/1			0/1			1	*		0			0
161	HGDP00359	Burusho	Pakistan	H1		M52	0/1			0/1			0/1			0/1			0			0/1			0/1			1	*		0			0
162	HGDP00428	Burusho	Pakistan	H1		M52	0/1			0/1			0/1			0/1			0			0/1			0/1			1	*		0			0
163	HGDP00438	Burusho	Pakistan	H1		M52	0/1			0/1			0/1			0/1			0			0/1			0/1			1	*		0			0
164	HGDP00890	Russian	Russia	I1*(xI1b1)	I1*	M253	0		1	0		1	0/1			0/1			0			0/1			0/1			0		1	0			0	yes
165	HGDP00895	Russian	Russia	I1*(xI1b1)	I1*	M253	0		*	0		*	0/1			0/1			0			0/1			0/1			0		*	0			0
166	HGDP00665	Sardinian	Italy	I2a2		M26	0		*	0		*	0		1	0		1	0			0/1			1	1		0		*	0			0		yes
167	HGDP01063	Sardinian	Italy	I2a2		M26	0		*	0		*	0		*	0		*	0			0/1			1	*		0		*	0			0	yes
168	HGDP00127	Hazara	Pakistan	I2b		M223	0		*	0		*	0/1			0/1			0			0/1			0/1			0		*	0			0	yes		yes
169	HGDP00894	Russian	Russia	I2b		P218,P219,P221	0		*	0		*	0/1			0/1			0			0/1			0/1			0		*	0			0
170	HGDP00197	Sindhi	Pakistan	J1*(xJ1e)	J1*	M267	0/1			0/1			0/1			0/1			0			0/1			0/1			0/1			0			0	yes
171	HGDP00645	Bedouin	Israel (Negev)	J1*(xJ1e)	J1*	M267	0/1			0/1			0/1			0/1			0			0/1			0/1			0/1			0			0
172	HGDP00597	Druze	Israel (Carmel)	J1e		P58	0/1			0/1			0/1			0/1			0			0/1			0/1			0		1	0			0	yes
173	HGDP00608	Bedouin	Israel (Negev)	J1e		P58	0/1			0/1			0/1			0/1			0			0/1			0/1			0		*	0			0	yes
174	HGDP00609	Bedouin	Israel (Negev)	J1e		P58	0/1			0/1			0/1			0/1			0			0/1			0/1			0		*	0			0
175	HGDP00611	Bedouin	Israel (Negev)	J1e		P58	0/1			0/1			0/1			0/1			0			0/1			0/1			0		*	0			0
176	HGDP00616	Bedouin	Israel (Negev)	J1e		P58	0/1			0/1			0/1			0/1			0			0/1			0/1			0		*	0			0
177	HGDP00618	Bedouin	Israel (Negev)	J1e		P58	0/1			0/1			0/1			0/1			0			0/1			0/1			0		*	0			0
178	HGDP00619	Bedouin	Israel (Negev)	J1e		P58	0/1			0/1			0/1			0/1			0			0/1			0/1			0		*	0			0
179	HGDP00623	Bedouin	Israel (Negev)	J1e		P58	0/1			0/1			0/1			0/1			0			0/1			0/1			0		*	0			0
180	HGDP00627	Bedouin	Israel (Negev)	J1e		P58	0/1			0/1			0/1			0/1			0			0/1			0/1			0		*	0			0
181	HGDP00629	Bedouin	Israel (Negev)	J1e		P58	0/1			0/1			0/1			0/1			0			0/1			0/1			0		*	0			0
182	HGDP00630	Bedouin	Israel (Negev)	J1e		P58	0/1			0/1			0/1			0/1			0			0/1			0/1			0		*	0			0
183	HGDP00631	Bedouin	Israel (Negev)	J1e		P58	0/1			0/1			0/1			0/1			0			0/1			0/1			0		*	0			0
184	HGDP00639	Bedouin	Israel (Negev)	J1e		P58	0/1			0/1			0/1			0/1			0			0/1			0/1			0		*	0			0
185	HGDP00641	Bedouin	Israel (Negev)	J1e		P58	0/1			0/1			0/1			0/1			0			0/1			0/1			0		*	0			0
186	HGDP00644	Bedouin	Israel (Negev)	J1e		P58	0/1			0/1			0/1			0/1			0			0/1			0/1			0		*	0			0
187	HGDP00648	Bedouin	Israel (Negev)	J1e		P58	0/1			0/1			0/1			0/1			0			0/1			0/1			0		*	0			0
188	HGDP00654	Bedouin	Israel (Negev)	J1e		P58	0/1			0/1			0/1			0/1			0			0/1			0/1			0		*	0			0
189	HGDP00678	Palestinian	Israel (Central)	J1e		P58	0/1			0/1			0/1			0/1			0			0/1			0/1			0		*	0			0
190	HGDP01076	Sardinian	Italy	J1e		P58	0/1			0/1			0/1			0/1			0			0/1			0/1			0		*	0			0
191	HGDP00056	Balochi	Pakistan	J2*(J2a1,2a,2b,6,7,J2b)	J2*	M172	0/1			0/1			0/1			0		1	0			0/1			0/1			0		1	0			0	yes
192	HGDP00099	Hazara	Pakistan	J2*(J2a1,2a,2b,6,7,J2b)	J2*	M172	0/1			0/1			0/1			0		*	0			0/1			0/1			0		*	0			0	yes
193	HGDP00137	Makrani	Pakistan	J2*(J2a1,2a,2b,6,7,J2b)	J2*	M172	0/1			0/1			0/1			0		*	0			0/1			0/1			0		*	0			0
194	HGDP00140	Makrani	Pakistan	J2*(J2a1,2a,2b,6,7,J2b)	J2*	M172	0/1			0/1			0/1			0		*	0			0/1			0/1			0		*	0			0
195	HGDP00201	Sindhi	Pakistan	J2*(J2a1,2a,2b,6,7,J2b)	J2*	M172	0/1			0/1			0/1			0		*	0			0/1			0/1			0		*	0			0
196	HGDP00576	Druze	Israel (Carmel)	J2*(J2a1,2a,2b,6,7,J2b)	J2*	M172	0/1			0/1			0/1			0		*	0			0/1			0/1			0		*	0			0
197	HGDP00600	Druze	Israel (Carmel)	J2*(J2a1,2a,2b,6,7,J2b)	J2*	M172	1	1		1	1		0/1			0		*	0			0/1			0/1			0		*	0			0		yes
198	HGDP01397	Adygei	Russia Caucasus	J2*(J2a1,2a,2b,6,7,J2b)	J2*	M172	0/1			0/1			0/1			0		*	0			0/1			0/1			0		*	0			0
199	HGDP00588	Druze	Israel (Carmel)	J2a1		M322	0/1			0/1			0/1			0		*	0			0/1			0/1			0		*	0			0	yes
200	HGDP00594	Druze	Israel (Carmel)	J2a1		M322	0/1			0/1			0/1			0		*	0			0/1			0/1			0		*	0			0	yes
201	HGDP00007	Brahui	Pakistan	J2a2a		M92	0/1			0/1			0/1			0		*	0			0/1			0/1			0		*	0			0	yes
202	HGDP00175	Sindhi	Pakistan	J2b2*(xJ2b2b,J2b2c)	J2b2*	M241	0/1			0/1			0/1			0/1			0			0/1			0/1			1	1		0			0	yes
203	HGDP00333	Kalash	Pakistan	J2b2*(xJ2b2b,J2b2c)	J2b2*	M241	0/1			0/1			0/1			0/1			0			0/1			0/1			1	*		0			0
204	HGDP00491	NAN Melanesian	Bougainville	K(xL,M1,NO,P,S,T)	K	M9,P128,P132	1	1		1	1		0		1	0/1			0			0/1			0/1			0/1			0			0	yes
205	HGDP00551	Papuan	New Guinea	K(xL,M1,NO,P,S,T)	K	M9,P128,P132	0/1			0/1			0/1			0/1			0			0/1			0/1			1	1		0			0
206	HGDP00556	Papuan	New Guinea	K(xL,M1,NO,P,S,T)	K	M9,P128,P132	0/1			0/1			0/1			0/1			0			0/1			0/1			0/1			0			0
207	HGDP00078	Balochi	Pakistan	L*(xL2b)	L*	M20,M22,M185,M295	0/1			0/1			0/1			0/1			0			0/1			0/1			1	1		0			0	yes	yes
208	HGDP00139	Makrani	Pakistan	L*(xL2b)	L*	M20,M22,M185,M295	0/1			0/1			0/1			0/1			0			0/1			0/1			1	*		0			0		yes
209	HGDP00177	Sindhi	Pakistan	L*(xL2b)	L*	M20,M22,M185,M295	0		1	0		1	1	1		0/1			0			0/1			0/1			0/1			0			0		yes
210	HGDP00258	Pathan	Pakistan	L*(xL2b)	L*	M20,M22,M185,M295	0		*	0		*	1	*		0/1			0			0/1			0/1			0/1			0			0		yes
211	HGDP00277	Kalash	Pakistan	L*(xL2b)	L*	M20,M22,M185,M295	0		*	0		*	1	*		0/1			0			0/1			0/1			0/1			0			0		yes
212	HGDP00279	Kalash	Pakistan	L*(xL2b)	L*	M20,M22,M185,M295	0		*	0		*	1	*		0/1			0			0/1			0/1			0/1			0			0		yes
213	HGDP00281	Kalash	Pakistan	L*(xL2b)	L*	M20,M22,M185,M295	0		*	0		*	1	*		0/1			0			0/1			0/1			0/1			0			0		yes
214	HGDP00311	Kalash	Pakistan	L*(xL2b)	L*	M20,M22,M185,M295	0		*	0		*	1	*		0/1			0			0/1			0/1			0/1			0			0		yes
215	HGDP00382	Burusho	Pakistan	L*(xL2b)	L*	M20,M22,M185,M295	0		*	0		*	1	*		0/1			0			0/1			0/1			0/1			0			0		yes
216	HGDP00445	Burusho	Pakistan	L*(xL2b)	L*	M20,M22,M185,M295	0		*	0		*	1	*		1	1		0			0/1			0/1			0/1			0			0		yes
217	HGDP00562	Druze	Israel (Carmel)	L*(xL2b)	L*	M20,M22,M185,M295	0/1			0/1			0/1			0/1			0			0/1			0/1			1	*		0			0		yes
218	HGDP00580	Druze	Israel (Carmel)	L*(xL2b)	L*	M20,M22,M185,M295	0/1			0/1			0/1			0/1			0			0/1			0/1			1	*		0			0		yes	yes
219	HGDP00598	Druze	Israel (Carmel)	L*(xL2b)	L*	M20,M22,M185,M295	0/1			0/1			0/1			0/1			0			0/1			0/1			1	*		0			0		yes
220	HGDP00602	Druze	Israel (Carmel)	L*(xL2b)	L*	M20,M22,M185,M295	0/1			0/1			0/1			0/1			0			0/1			0/1			1	*		0			0		yes
221	HGDP00604	Druze	Israel (Carmel)	L*(xL2b)	L*	M20,M22,M185,M295	0/1			0/1			0/1			0/1			0			0/1			0/1			1	*		0			0		yes
222	HGDP00605	Druze	Israel (Carmel)	L*(xL2b)	L*	M20	0/1			0/1			0/1			0/1			0			0/1			0/1			1	*		0			0		yes
223	HGDP01298	Uygur	China	L*(xL2b)	L*	M20,M22,M185,M295	0		*	0		*	1	*		0/1			0			0/1			0/1			0/1			0			0		yes
224	HGDP00490	NAN Melanesian	Bougainville	M1*(xM1b1a)	M1*	M106	0		1	0		1	1	1		0		1	0			1	1		0/1			0/1			0			0	yes	yes
225	HGDP00548	Papuan	New Guinea	M1*(xM1b1a)	M1*	M106,M189	0/1			0/1			0/1			0		*	0			1	*		0/1			0/1			0			0		yes
226	HGDP00549	Papuan	New Guinea	M1*(xM1b1a)	M1*	M106,M189	0/1			0/1			0/1			0		*	0			1	*		0/1			0/1			0			0			yes
227	HGDP00655	NAN Melanesian	Bougainville	M1*(xM1b1a)	M1*	M106,M189	0		*	0		*	1	*		0		*	0			1	*		0/1			0/1			0			0	yes
228	HGDP00788	NAN Melanesian	Bougainville	M1*(xM1b1a)	M1*	M106,M189,M16	0		*	0		*	1	*		0		*	0			1	*		0/1			0/1			0			0		yes
229	HGDP00789	NAN Melanesian	Bougainville	M1*(xM1b1a)	M1*	M106	0		*	0		*	1	*		0		*	0			1	*		0/1			0/1			0			0
230	HGDP00823	NAN Melanesian	Bougainville	M1*(xM1b1a)	M1*	M106	0		*	0		*	1	*		0		*	0			1	*		0/1			0/1			0			0			yes
231	HGDP00824	NAN Melanesian	Bougainville	M1*(xM1b1a)	M1*	M106	0		*	0		*	1	*		0		*	0			1	*		0/1			0/1			0			0
232	HGDP00541	Papuan	New Guinea	M1*(xM1b1a)	M1*	M106,M189	0		*	0		*	1	*		0		*	0			1	*		0		1	0		1	0			0		yes
233	HGDP00542	Papuan	New Guinea	M1*(xM1b1a)	M1*	M106,M189	0		*	0		*	1	*		0		*	0			1	*		0		*	0		*	0			0		yes
234	HGDP00553	Papuan	New Guinea	M1*(xM1b1a)	M1*	M106,M189	0/1			0/1			1	*		0		*	0			0/1			0/1			1	1		0			0		yes	yes
235	HGDP00662	NAN Melanesian	Bougainville	M1*(xM1b1a)	M1*	M106,M189	0		*	0		*	1	*		0		*	0			1	*		0/1			0/1			0			0		yes	yes
236	HGDP01182	Yizu	China	N*(xN1c)	N*	M231	0/1			0/1			0/1			0/1			0			0		1	1	1		1	1		0			0	yes	yes
237	HGDP01192	Miaozu	China	N*(xN1c)	N*	M231	0/1			0/1			0/1			0/1			0			0		*	1	*		1	*		0			0			yes
238	HGDP01292	Han	China	N*(xN1c)	N*	M231	0/1			0/1			0/1			0/1			0			0		*	1	*		1	*		0			0
239	HGDP01295	Han	China	N*(xN1c)	N*	M231	0/1			0/1			0/1			0/1			0			0		*	1	*		1	*		0			0
240	HGDP01339	Naxi	China	N*(xN1c)	N*	M231	0/1			0/1			0/1			0/1			0			0		*	1	*		1	*		0			0
241	HGDP01344	Naxi	China	N*(xN1c)	N*	M231	0/1			0/1			0/1			0/1			0			0		*	1	*		1	*		0			0
242	HGDP01348	Tu	China	N*(xN1c)	N*	M231	0/1			0/1			0/1			0		1	0			0/1			0/1			1	*		0			0	yes
243	HGDP01352	Tu	China	N*(xN1c)	N*	M231	0/1			0/1			0/1			0		*	0			0/1			0/1			1	*		0			0
244	HGDP00879	Russian	Russia	N1c		Tat	0/1			0/1			0/1			0/1			0			0/1			0/1			1	*		0			0	yes
245	HGDP00891	Russian	Russia	N1c		Tat	0/1			0/1			0/1			0/1			0			0/1			0/1			1	*		0			0
246	HGDP00945	Yakut	Siberia	N1c		Tat	0/1			0/1			0/1			0/1			0			0/1			0/1			1	*		0			0
247	HGDP00946	Yakut	Siberia	N1c		Tat	0/1			0/1			0/1			0/1			0			0/1			0/1			1	*		0			0
248	HGDP00947	Yakut	Siberia	N1c		Tat	0/1			0/1			0/1			0/1			0			0/1			0/1			1	*		0			0
249	HGDP00948	Yakut	Siberia	N1c		Tat	0/1			0/1			0/1			0/1			0			0/1			0/1			1	*		0			0
250	HGDP00949	Yakut	Siberia	N1c		Tat	0/1			0/1			0/1			0/1			0			0/1			0/1			1	*		0			0
251	HGDP00950	Yakut	Siberia	N1c		Tat	0/1			0/1			0/1			0/1			0			0/1			0/1			1	*		0			0
252	HGDP00951	Yakut	Siberia	N1c		Tat	0/1			0/1			0/1			0/1			0			0/1			0/1			1	*		0			0
253	HGDP00952	Yakut	Siberia	N1c		Tat	0/1			0/1			0/1			0/1			0			0/1			0/1			1	*		0			0
254	HGDP00953	Yakut	Siberia	N1c		Tat	0/1			0/1			0/1			0/1			0			0/1			0/1			1	*		0			0
255	HGDP00954	Yakut	Siberia	N1c		Tat	0/1			0/1			0/1			0/1			0			0/1			0/1			1	*		0			0
256	HGDP00960	Yakut	Siberia	N1c		Tat	0/1			0/1			0/1			0/1			0			0/1			0/1			1	*		0			0
257	HGDP00961	Yakut	Siberia	N1c		Tat	0/1			0/1			0/1			0/1			0			0/1			0/1			1	*		0			0
258	HGDP00964	Yakut	Siberia	N1c		Tat	0/1			0/1			0/1			0/1			0			0/1			0/1			1	*		0			0
259	HGDP00965	Yakut	Siberia	N1c		Tat	0/1			0/1			0/1			0/1			0			0/1			0/1			1	*		0			0
260	HGDP00968	Yakut	Siberia	N1c		Tat	0/1			0/1			0/1			0/1			0			0/1			0/1			1	*		0			0
261	HGDP00775	Han	China	O*(xO1a,O2a,O2b,O3)	O*	M175,P186,P191,P196	0/1			0/1			0/1			0/1			0			0/1			0/1			0/1			0			0	yes
262	HGDP00786	Han	China	O*(xO1a,O2a,O2b,O3)	O*	M175,P186,P191,P196	0/1			0/1			0/1			0/1			0			0/1			0/1			0/1			0			0		yes
263	HGDP01217	Daur	China	O*(xO1a,O2a,O2b,O3)	O*	M175,P186,P191,P196	0/1			0/1			0/1			0/1			0			0/1			0/1			0/1			0			0
264	HGDP01342	Naxi	China	O*(xO1a,O2a,O2b,O3)	O*	M175,P186,P191,P196	0/1			0		1	1	1		0/1			0			0/1			0/1			0/1			0			0
265	HGDP00774	Han	China	O1a*(xO1a2)	O1a*	M119	0/1			0/1			0/1			0/1			0			0		1	0/1			0/1			0			0	yes
266	HGDP00780	Han	China	O1a*(xO1a2)	O1a*	M119	0/1			0/1			0/1			0/1			0			0/1			0/1			0		1	0			0	yes
267	HGDP00785	Han	China	O1a*(xO1a2)	O1a*	M119	0/1			0/1			0/1			0/1			0			0/1			0/1			0		*	0			0
268	HGDP00977	Han	China	O1a*(xO1a2)	O1a*	M119	0/1			0/1			0/1			0		1	0			0		*	0/1			0		*	0			0		yes
269	HGDP01327	She	China	O1a*(xO1a2)	O1a*	M119	0/1			0/1			0/1			0/1			0			0/1			0/1			0		*	0			0
270	HGDP01330	She	China	O1a*(xO1a2)	O1a*	M119	0/1			0/1			0/1			0/1			0			0/1			0/1			0		*	0			0
271	HGDP01179	Yizu	China	O2a*(xO2a1)	O2a*	M95	0/1			0/1			0/1			0/1			0			0/1			0/1			0/1			0			0	yes
272	HGDP01184	Yizu	China	O2a*(xO2a1)	O2a*	M95	0/1			0/1			0/1			0/1			0			0/1			0/1			0		1	0			0	yes
273	HGDP01190	Miaozu	China	O2a*(xO2a1)	O2a*	M95	0/1			0/1			0/1			0/1			0			0/1			0/1			0/1			0			0
274	HGDP01289	Han	China	O2a*(xO2a1)	O2a*	M95	0/1			0/1			0/1			0/1			0			0/1			0		1	0/1			0			0
275	HGDP01311	Dai	China	O2a*(xO2a1)	O2a*	M95	0/1			0/1			0/1			0/1			0			0/1			0/1			0		*	0			0
276	HGDP01312	Dai	China	O2a*(xO2a1)	O2a*	M95	0/1			0/1			0/1			0/1			0			0/1			0/1			0/1			0			0
277	HGDP01313	Dai	China	O2a*(xO2a1)	O2a*	M95	0/1			0/1			0/1			0/1			0			0/1			0/1			0		*	0			0
278	HGDP01349	Tu	China	O2a*(xO2a1)	O2a*	M95	0/1			0/1			0/1			0/1			0			0/1			0/1			0/1			0			0
279	HGDP00782	Han	China	O2a1		M88	0/1			0/1			0/1			0/1			0			0/1			0/1			0/1			0			0	yes
280	HGDP01095	Tujia	China	O2a1		M88	0/1			0/1			0/1			0/1			0			0/1			0/1			0/1			0			0	yes
281	HGDP01181	Yizu	China	O2a1		M88	0/1			0/1			0/1			0		1	0			0/1			0/1			0/1			0			0
282	HGDP01191	Miaozu	China	O2a1		M88	0/1			0/1			0/1			0/1			0			0/1			0/1			0/1			0			0
283	HGDP00748	Japanese	Japan	O2b		SRY465	0/1			0/1			0/1			0/1			0			0/1			0/1			0/1			0			0	yes
284	HGDP00750	Japanese	Japan	O2b		SRY465	0/1			0/1			0/1			0/1			0			0/1			0/1			0/1			0			0
285	HGDP00755	Japanese	Japan	O2b		SRY465	0/1			1	1		0		1	0		1	0			0/1			0/1			0/1			0			0		yes
286	HGDP00763	Japanese	Japan	O2b		SRY465	0/1			1	*		0		*	0		*	0			0/1			0/1			0/1			0			0
287	HGDP00766	Japanese	Japan	O2b		SRY465	0/1			0/1			0/1			0/1			0			0/1			0/1			0/1			0			0
288	HGDP01240	Hezhen	China	O2b		SRY465	0/1			0/1			0		*	0/1			0			0/1			0/1			0/1			0			0
289	HGDP00973	Han	China	O3a3*(xO3a3b1,O3a3c)	O3a3*	P201	0/1			0/1			0/1			0/1			0			0/1			0/1			1	1		0		1	0	yes
290	HGDP01216	Daur	China	O3a3*(xO3a3b1,O3a3c)	O3a3*	P201	0/1			0/1			0/1			0/1			0			0/1			0/1			1	*		0/1			0
291	HGDP00819	Han	China	O3a3b1		M188	0/1			0/1			0/1			0		1	0			0/1			0/1			1	*		0/1			0
292	HGDP01194	Miaozu	China	O3a3b1		M188	0/1			0/1			0/1			0/1			0			0/1			0/1			1	*		0/1			0	yes
293	HGDP01329	She	China	O3a3b1		M188	0/1			0/1			0/1			0/1			0			0/1			0/1			1	*		0/1			0	yes
294	HGDP01332	She	China	O3a3b1		M188	0/1			0/1			0/1			0/1			0			0/1			0/1			1	*		0/1			0
295	HGDP00412	Burusho	Pakistan	O3a3c		M134	1	1		1	1		1	1		0/1			0			0/1			0/1			1	*		0/1			0	yes
296	HGDP00753	Japanese	Japan	O3a3c		M134	1	*		1	*		0/1			0/1			0			0/1			0/1			1	*		0/1			0
297	HGDP00779	Han	China	O3a3c		M134	0/1			0/1			0/1			0/1			0			0/1			0/1			1	*		0/1			0	yes		yes
298	HGDP00815	Han	China	O3a3c		M134	0/1			0/1			0/1			0/1			0			0/1			0/1			1	*		0/1			0
299	HGDP00821	Han	China	O3a3c		M134	0/1			0/1			0/1			0/1			0			0/1			0/1			1	*		0/1			0
300	HGDP00822	Han	China	O3a3c		M134	0/1			0/1			0/1			0/1			0			0/1			0/1			1	*		0/1			0
301	HGDP01096	Tujia	China	O3a3c		M134	0/1			0/1			0/1			0/1			0			0/1			0/1			1	*		0/1			0
302	HGDP01186	Yizu	China	O3a3c		M134	0/1			0/1			0/1			0/1			0			0/1			0/1			1	*		0/1			0
303	HGDP01225	Mongola	China	O3a3c		M134	0/1			0/1			0/1			0/1			0			0/1			0/1			1	*		0/1			0
304	HGDP01228	Mongola	China	O3a3c		M134	1	*		1	*		0/1			0/1			0			0/1			0/1			1	*		0		1	0
305	HGDP01229	Mongola	China	O3a3c		M134	0/1			0/1			0/1			0/1			0			0/1			0/1			1	*		0/1			0
306	HGDP01241	Hezhen	China	O3a3c		M134	0/1			0/1			0/1			0/1			0			0/1			0/1			1	*		0/1			0
307	HGDP01290	Han	China	O3a3c		M134	0/1			0/1			0/1			0/1			0			0/1			0/1			1	*		0/1			0
308	HGDP01328	She	China	O3a3c		M134	1	*		1	*		0/1			0/1			0			0/1			0/1			1	*		0/1			0
309	HGDP01338	Naxi	China	O3a3c		M134	0/1			0/1			0/1			0/1			0			0/1			0/1			1	*		0/1			0
310	HGDP01347	Tu	China	O3a3c		M134	1	*		1	*		0/1			0/1			0			0/1			0/1			1	*		0/1			0
311	HGDP01351	Tu	China	O3a3c		M134	1	*		1	*		0/1			0/1			0			0/1			0/1			1	*		0/1			0
312	HGDP01353	Tu	China	O3a3c		M134	1	*		1	*		0/1			0/1			0			0/1			0/1			1	*		0/1			0
313	HGDP00124	Hazara	Pakistan	O3a4		JST002611	0/1			1	1		0/1			0		1	0			0/1			0/1			1	*		0/1			0
314	HGDP00751	Japanese	Japan	O3a4		JST002611	0/1			1	*		0/1			0		*	0			0/1			0/1			1	*		0/1			0	yes
315	HGDP00971	Han	China	O3a4		JST002611	0/1			1	*		0/1			0		*	0			0/1			0/1			1	*		0/1			0
316	HGDP01187	Yizu	China	O3a4		JST002611	0/1			1	*		0/1			0		*	0			0/1			0/1			1	*		0/1			0
317	HGDP01294	Han	China	O3a4		JST002611	0/1			1	*		0/1			0		*	0			0/1			0/1			1	*		0/1			0
318	HGDP01309	Dai	China	O3a4		JST002611	0/1			1	*		0/1			0		*	0			0/1			0/1			1	*		1	1		0		yes
319	HGDP01331	She	China	O3a4		JST002611	0/1			1	*		0/1			0		*	0			0/1			0/1			1	*		0/1			0
320	HGDP00100	Hazara	Pakistan	Q*(xQ1a)	Q*	M242	0/1			0/1			0/1			0/1			0		1	1	1		0/1			0/1			0			0	yes	yes
321	HGDP00251	Pathan	Pakistan	Q*(xQ1a)	Q*	M242	0/1			0/1			0/1			0/1			0/1			0/1			0/1			0/1			0			0	yes
322	HGDP00777	Han	China	Q1a*(xQ1a3a,Q1a6)	Q1a*	MEH2	0/1			0/1			0/1			0/1			0/1			0/1			0/1			0		1	0			0	yes
323	HGDP00896	Russian	Russia	Q1a*(xQ1a3a,Q1a6)	Q1a*	MEH2	0/1			0/1			0/1			0/1			0/1			0/1			0/1			0/1			0			0
324	HGDP01227	Mongola	China	Q1a*(xQ1a3a,Q1a6)	Q1a*	MEH2	0		1	0		1	1	1		1	1		0		1	1	1		0		1	0/1			0			0		yes
325	HGDP01337	Naxi	China	Q1a*(xQ1a3a,Q1a6)	Q1a*	MEH2	0/1			0/1			0/1			0/1			0/1			0/1			0/1			0		*	0			0
326	HGDP01340	Naxi	China	Q1a*(xQ1a3a,Q1a6)	Q1a*	MEH2	0/1			0/1			0/1			0/1			0/1			0/1			0/1			0		*	0			0			yes
327	HGDP01341	Naxi	China	Q1a*(xQ1a3a,Q1a6)	Q1a*	MEH2	0/1			0/1			0/1			0/1			0/1			0/1			0/1			0		*	0			0
328	HGDP00792	Colombian	Colombia	Q1a3a*		M3	0/1			0/1			0/1			0/1			0/1			0/1			0/1			0/1			0			0	yes
329	HGDP01005	Karitiana	Brazil	Q1a3a*		M3	0/1			0/1			0/1			0/1			0/1			0/1			0/1			0/1			0			0
330	HGDP01009	Karitiana	Brazil	Q1a3a*		M3	0/1			0		1	0/1			0/1			0/1			0/1			0/1			0		1	0			0
331	HGDP01012	Karitiana	Brazil	Q1a3a*		M3	0/1			0/1			0/1			0/1			0/1			0/1			0/1			0/1			0			0
332	HGDP01013	Karitiana	Brazil	Q1a3a*		M3	0/1			0/1			0/1			0/1			0/1			0/1			0/1			0/1			0			0
333	HGDP01015	Karitiana	Brazil	Q1a3a*		M3	0/1			0/1			0/1			0/1			0/1			0/1			0/1			0/1			0			0
334	HGDP01019	Karitiana	Brazil	Q1a3a*		M3	0/1			0/1			0/1			0/1			0/1			0/1			0/1			0/1			0			0
335	HGDP00330	Kalash	Pakistan	R*		M207, rs1865680,P224,P232,P285	0/1			0/1			0/1			0/1			0/1			0/1			0/1			0/1			0			0	yes
336	HGDP00364	Burusho	Pakistan	R*		M207, rs1865680,P224,P232,P285	0/1			0/1			0/1			0/1			0/1			0/1			0/1			1	1		0			0
337	HGDP00372	Burusho	Pakistan	R*		M207, rs1865680,P224,P232,P285	0/1			0/1			0/1			0/1			0/1			0/1			0/1			0		1	0			0
338	HGDP00388	Burusho	Pakistan	R*		M207, rs1865680,P224,P232,P285	0/1			0/1			0/1			0/1			0/1			0/1			0/1			0/1			0			0
339	HGDP00402	Burusho	Pakistan	R*		M207, rs1865680,P224,P232,P285	0/1			0/1			0/1			0/1			0/1			0/1			0/1			1	*		0			0
340	HGDP00407	Burusho	Pakistan	R*		M207, rs1865680,P224,P232,P285	0/1			0/1			0/1			0/1			0/1			0/1			0/1			1	*		0			0
341	HGDP00031	Brahui	Pakistan	R1a1*(xR1a1c)	R1a1*	M17	0/1			0/1			0/1			0/1			0		1	0/1			0/1			0/1			0			0	yes
342	HGDP00179	Sindhi	Pakistan	R1a1*(xR1a1c)	R1a1*	M17	0/1			0/1			0/1			0/1			0		*	0/1			0/1			0/1			0			0
343	HGDP00203	Sindhi	Pakistan	R1a1*(xR1a1c)	R1a1*	M17	0/1			0/1			1	1		0/1			0		*	0/1			0/1			0/1			0			0
344	HGDP00302	Kalash	Pakistan	R1a1*(xR1a1c)	R1a1*	M17	0/1			0/1			0/1			0/1			0		*	0/1			0/1			0/1			0			0
345	HGDP00307	Kalash	Pakistan	R1a1*(xR1a1c)	R1a1*	M17	0/1			0/1			0/1			0/1			0		*	0/1			0/1			0/1			0			0
346	HGDP00313	Kalash	Pakistan	R1a1*(xR1a1c)	R1a1*	M17	0/1			0/1			0/1			0/1			0		*	0/1			0/1			0/1			0			0
347	HGDP00315	Kalash	Pakistan	R1a1*(xR1a1c)	R1a1*	M17	0/1			0/1			0/1			0/1			0		*	0/1			0/1			0/1			0			0
348	HGDP00341	Burusho	Pakistan	R1a1*(xR1a1c)	R1a1*	M17	0/1			0/1			0/1			0/1			0		*	0/1			0/1			0/1			0			0
349	HGDP00346	Burusho	Pakistan	R1a1*(xR1a1c)	R1a1*	M17	0/1			0/1			0/1			0/1			0		*	0/1			0/1			0/1			0			0
350	HGDP00625	Bedouin	Israel (Negev)	R1a1*(xR1a1c)	R1a1*	M17	0/1			0/1			0/1			0/1			0		*	0/1			0/1			0/1			0			0
351	HGDP00880	Russian	Russia	R1a1*(xR1a1c)	R1a1*	M17	0/1			0/1			0/1			0/1			0		*	0/1			0/1			0/1			0			0
352	HGDP00888	Russian	Russia	R1a1*(xR1a1c)	R1a1*	M17	0/1			0/1			0/1			0/1			0		*	0/1			0/1			0/1			0			0
353	HGDP00892	Russian	Russia	R1a1*(xR1a1c)	R1a1*	M17	0/1			0/1			0/1			0/1			0		*	0/1			0/1			0/1			0			0
354	HGDP00897	Russian	Russia	R1a1*(xR1a1c)	R1a1*	M17	0/1			0/1			0/1			0/1			0		*	0/1			0/1			0/1			0			0
355	HGDP00900	Russian	Russia	R1a1*(xR1a1c)	R1a1*	M17	0/1			0/1			0/1			0/1			0		*	0/1			0/1			0/1			0			0
356	HGDP01297	Uygur	China	R1a1*(xR1a1c)	R1a1*	M17	0/1			0/1			0/1			0/1			0		*	0/1			0/1			0/1			0			0
357	HGDP01350	Tu	China	R1a1*(xR1a1c)	R1a1*	M17	0/1			0/1			0/1			0/1			0		*	0/1			0/1			0/1			0			0
358	HGDP01396	Adygei	Russia Caucasus	R1a1*(xR1a1c)	R1a1*	M17	0/1			0/1			0/1			0/1			0		*	0/1			0/1			0/1			0			0
359	HGDP01261	Mozabite	Algeria (Mzab)	R1b1*(xR1b1a,R1b1b1,R1b1b2)	R1b1*	P25	0/1			0/1			0/1			0/1			0/1			0/1			0/1			0/1			0			0	yes	yes
360	HGDP01271	Mozabite	Algeria (Mzab)	R1b1*(xR1b1a,R1b1b1,R1b1b2)	R1b1*	P25	0/1			0/1			0/1			0/1			0/1			0/1			0/1			0/1			0			0
361	HGDP01299	Uygur	China	R1b1*(xR1b1a,R1b1b1,R1b1b2)	R1b1*	P25	0/1			0/1			0/1			0/1			0/1			0/1			0/1			0/1			0			0
362	HGDP00102	Hazara	Pakistan	R1b1b1		M73	0/1			0/1			0/1			0/1			0/1			0/1			0/1			0/1			0			0	yes
363	HGDP00113	Hazara	Pakistan	R1b1b1		M73	0/1			0/1			0/1			0/1			0/1			0/1			0/1			0/1			0			0
364	HGDP00519	French	France	R1b1b2a2*(xR1b1b2a2g2)	R1b1b2a2*	P312	0/1			0/1			0/1			0/1			0/1			0/1			0/1			0		1	0			0
365	HGDP00595	Druze	Israel (Carmel)	R1b1b2a2*(xR1b1b2a2g2)	R1b1b2a2*	P312	0/1			0/1			0/1			0/1			0/1			0/1			0/1			0		*	0			0	yes
366	HGDP00804	Orcadian	Orkney Islands	R1b1b2a2*(xR1b1b2a2g2)	R1b1b2a2*	P312	0/1			0/1			0/1			0/1			0/1			0/1			0/1			0		*	0			0
367	HGDP01359	French Basque	France	R1b1b2a2*(xR1b1b2a2g2)	R1b1b2a2*	P312	0/1			0/1			0/1			0/1			0/1			0/1			0/1			0		*	0			0
368	HGDP01361	French Basque	France	R1b1b2a2*(xR1b1b2a2g2)	R1b1b2a2*	P312	0/1			0/1			0/1			0/1			0/1			0/1			0/1			0		*	0			0
369	HGDP01370	French Basque	France	R1b1b2a2*(xR1b1b2a2g2)	R1b1b2a2*	P312	0/1			0/1			0/1			0/1			0/1			0/1			0/1			0		*	0			0
370	HGDP01371	French Basque	France	R1b1b2a2*(xR1b1b2a2g2)	R1b1b2a2*	P312	0/1			0/1			0/1			0/1			0/1			0/1			0/1			0		*	0			0
371	HGDP01372	French Basque	France	R1b1b2a2*(xR1b1b2a2g2)	R1b1b2a2*	P312	0/1			0/1			0/1			0/1			0/1			0/1			0/1			0		*	0			0
372	HGDP00376	Burusho	Pakistan	R2		M124	0/1			0/1			0/1			0		1	0/1			0/1			0/1			1	1		0			0
373	HGDP00397	Burusho	Pakistan	R2		M124	0/1			0/1			0/1			0/1			0/1			0/1			0/1			1	*		0			0	yes
374	HGDP00433	Burusho	Pakistan	R2		M124	0/1			0/1			0/1			0/1			0/1			0/1			0/1			1	*		0			0
375	HGDP00540	Papuan	New Guinea	S1*(xS1d)	S1*	M254	0/1			0/1			0/1			0		1	0			0/1			0/1			0		1	0			0	yes
376	HGDP00543	Papuan	New Guinea	S1*(xS1d)	S1*	M254,M226	0/1			0/1			0/1			0/1			0			0/1			0/1			0/1			0			0
377	HGDP00555	Papuan	New Guinea	S1*(xS1d)	S1*	M254	0/1			0/1			0/1			0/1			0			0/1			0/1			1	1		0			0
378	HGDP01245	Xibo	China	T*(xT1)	T*	M70,M272	0/1			0/1			0/1			0/1			0			0/1			0		1	1	1		0			0	yes
		Total number and direction of gene conversion events identified						5	14		6	9		12	4		6	19		0	3		10	4		4	11		16	20		1	2
	a "1" denotes a haplogroup-specific gene conversion event; "*" denotes other cases within the same haplogroup, or its subhaplogroups, which, under a maximum parsimony criterion, are considered to represent the same event.
	yellow fill denotes gene conversion events defined as co-conversions
